# Supplementary material for: Clinical and Radiographic Evaluation of the Effect of Flapless Dental Implant Treatment on Early Bone Loss and Patient Comfort Flapless Dental Implant Treatment Decreases Early Bone Loss around Dental Implants
Source: Research Square preprint supplement (doi:10.21203/rs.3.rs-6902962/v1), 2025-08-11
Supplement: Supplementary file 1 [file 19b2a95ba7de987310904be4.docx]

**Table1** Distribution and characteristics of patients and implants according to study group

| Group | Patient | Implant | Area | R |
| --- | --- | --- | --- | --- |
| Flap (F) | 13 | 21 | 13 molar &  8 premolar | 9 pieces of 3.7mmx12mm (n=1)  3.7mmx10mm  (n=8)  4.1mmx10mm  (n=8)  4.8mmx10mm  (n=2)  4.8mmx 8mm  (n=2) |
| Flapless (FL) | 11 | 16 | 8 molar &  8 premolar | 3.7mmx 10mm  (n=4)  4.1mmx10mm  (n=11)  4.1mmx 8mm  (=1) |

**Table 2** Evaluation of implant MBL levels of the groups using Student’s t test

| **Bone loss** | **Average (mm)** | **Standard deviation (mm)** | **p** |
| --- | --- | --- | --- |
| FL Group (n:16) | 0,117 | 0,786 | **0,046** |
| F Group  (n:21) | 0,611 | 0,664 |

**Table 3** Evaluation of ISQ values ​​of groups with Student’s t test

|  | Primary Stability | | | Secondary Stability | | | Stability Change | | |
| --- | --- | --- | --- | --- | --- | --- | --- | --- | --- |
| **Av.** | **SD** | **p** | **Av.** | **SD** | **p** | **Av.** | **SD** | **p** |
| FL Group (n:16) | 69,86 | 9,25 | 0,135 | 67,06 | 6,74 | 0,619 | -2,80 | -10,13 | 0,274 |
| F Group  (n:21) | 64,74 | 10,69 | 65,98 | 6,38 | 1,24 | -11,53 |

**Table 4** Evaluation of MBL findings with ISQ (primary stabilization) values ​​measured during surgery and ISQ (seconder stabilization) values ​​measured 3 months after the operation using Pearson correlation analysis

|  | **Surgical ISQ** | | **3 months ISQ** | |
| --- | --- | --- | --- | --- |
| **r** | **p** | **r** | **p** |
| FL Group  F Group  All Implants | 0,171  -0,260  -0,149 | 0.527  0.254  0,380 | -0,185  -0,234  -0,226 | 0,492  0,307  0,180 |

**Table 5** Evaluation of VAS scores between groups using Student’s t test

| **VAS (n:37)** | **Group** | **Average** | **Standard Deviation** | **p** |
| --- | --- | --- | --- | --- |
| Day 3 | FL (n:16) | 2,41 | 1 | **< 0,001** |
| F (n:21) | 5,92 | 1,3 |
| Day 7 | FL (n:16) | 0,21 | 0,35 | **< 0,001** |
| F (n:21) | 1,2 | 0,82 |

**Table 6** Evaluation of OHIP-14 scores between groups using Student’s t test

| **OHIP 14 (n:37)** | | **Average** | **Standard Deviation** | **p** |
| --- | --- | --- | --- | --- |
| Functional Limitation (Day 3) | FL (n:16) | 2,38 | 2,1 | **0,009** |
| F (n:21) | 4,14 | 1,77 |
| Pain  (Day 3) | FL (n:16) | 3,69 | 2,21 | **0,004** |
| F (n:21) | 5,67 | 1,71 |
| Psychological Impact (Day 3) | FL (n:16) | 6,13 | 5,98 | **0,018** |
| F (n:21) | 10,33 | 4,37 |
| Behavioral Impact (Day 3) | FL (n:16) | 3,88 | 4,27 | 0,066 |
| F (n:21) | 6,38 | 3,75 |
| Total (Day 3) | FL (n:16) | 16,06 | 13,42 | **0,01** |
| F (n:21) | 28,52 | 9,8 |
| Functional Limitation  (Day 7) | FL (n:16) | 0,38 | 1,03 | **0,002** |
| F (n:21) | 2 | 1,67 |
| Pain  (Day 7) | FL (n:16) | 0,5 | 0,89 | **0,004** |
| F (n:21) | 2,19 | 2,04 |
| Psychological Impact (Day 7) | FL (n:16) | 2,75 | 4,78 | **0,043** |
| F (n:21) | 6,52 | 5,86 |
| Behavioral  Impact (Day 7) | FL (n:16) | 1,13 | 2,06 | **0,031** |
| F (n:21) | 2,95 | 2,71 |
| Total (Day 7) | FL (n:16) | 4,75 | 8,47 | **0,012** |
| F (n:21) | 13,67 | 11,23 |
